# Supplementary material for: Mitofusin-2 Down-Regulation Predicts Progression of Non-Muscle Invasive Bladder Cancer
Source: MDPI journal article supplement (doi:10.3390/diagnostics11081500), 2021-08-20
Supplement: s1 [file s1]

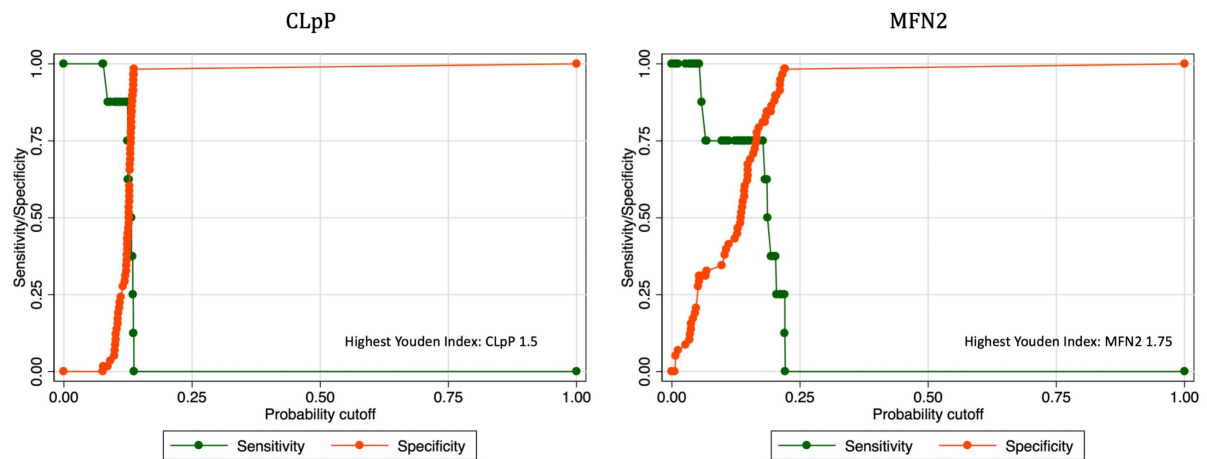

**Figure S1.** Graphical representation of Sensitivity and specificity according to mitochondrial proteins expression levels in the prediction of disease progression at 24 months of follow-up. The cutoffs of Mfn2 and ClpP with the highest Youden Index and thus, with the best combination of sensitivity and specificity were 1.75 and 1.5 for Mfn-2 and ClpP, respectively.
